# Supplementary material
Source: ML conference proceedings conference paper supplement (https://proceedings.neurips.cc/paper_files/paper/2017/hash/8fb5f8be2aa9d6c64a04e3ab9f63feee-Abstract.html)
Supplement: Supplementary file [file 8fb5f8be2aa9d6c64a04e3ab9f63feee-Supplemental.zip]

# Supplementary Material for “Information Theoretic Properties of Markov Random Fields, and their Algorithmic Applications”

## A Omitted Proofs in Section 2

### A.1 Markov Random Fields and the Canonical Form

**Claim A.1.** *Every Markov random field can be put in canonical form*

*Proof.* We will recenter the tensors one by one without changing the law in (1). Starting with an arbitrary parameterization, observe that if the sum along some tensor fiber is  $s \neq 0$ , we can subtract  $s/k_{i_m}$  from each of the entries in the tensor fiber, so the sum over the tensor fiber is now zero, and add  $s$  to  $\theta^{i \sim m}(a_{\sim m})$  without changing the law of  $X$  in (1). Here  $i \sim m$  is our notation for  $i_1, \dots, i_{m-1}, i_{m+1}, \dots, i_\ell$ . By iterating this process from the tensors representing the highest-order interactions down to the tensors representing the lowest-order interactions<sup>1</sup>, we obtain the desired canonical form.  $\square$

### A.2 Lower Bounds for Conditional Mutual Information

As in Bresler’s work on learning Ising models [1], certain information theoretic quantities will play a crucial role as a progress measure in our algorithms. Specifically, we will use the functional

$$\nu_{u,I|S} := \mathbf{E}_{R,G} \left[ \mathbf{E}_{X_S} \left[ \left| \Pr(X_u = R, X_I = G | X_S) - \Pr(X_u = R | X_S) \Pr(X_I = G | X_S) \right| \right] \right]$$

where  $R$  is a state drawn uniformly at random from  $[k_u]$ , uniformly at random and  $G$  is an  $|I|$ -tuple of states drawn independently uniformly at random from  $[k_{i_1}] \times [k_{i_2}] \times \dots \times [k_{i_{|I|}}]$  where  $I = (i_1, i_2, \dots, i_{|I|})$ . This will be used as a *proxy* for conditional mutual information which can be efficiently estimated from samples. The following lemma is a version of Lemma 5.1 in [1] that works over non-binary alphabets.

**Lemma A.2.** *Fix a set of nodes  $S$ . Fix a node  $u$  and a set of nodes  $I$  that are not contained in  $S$ . Then*

$$\sqrt{\frac{1}{2} I(X_u; X_I | X_S)} \geq \nu_{u,I|S}$$

*Proof.*

$$\begin{aligned} \sqrt{\frac{1}{2} I(X_u; X_I | X_S)} &= \sqrt{\frac{1}{2} \mathbf{E}_{X_S=x_S} [I(X_u; X_I | X_S = x_S)]} \\ &\geq \mathbf{E}_{X_S=x_S} \left[ \sqrt{\frac{1}{2} I(X_u; X_I | X_S = x_S)} \right] \\ &= \mathbf{E}_{X_S=x_S} \left[ \sqrt{\frac{1}{2} D_{KL}(\Pr(X_u, X_I | X_S = x_S) \parallel \Pr(X_u | X_S = x_S) \Pr(X_I | X_S = x_S))} \right] \\ &\geq \mathbf{E}_{X_S} [\sup_{R,G} |\Pr(X_u = R, X_I = G | X_S) - \Pr(X_u = R | X_S) \Pr(X_I = G | X_S)|] \\ &\geq \mathbf{E}_{X_S} [\mathbf{E}_{R,G} |\Pr(X_u = R, X_I = G | X_S) - \Pr(X_u = R | X_S) \Pr(X_I = G | X_S)|] \\ &= \nu_{u,I|S}. \end{aligned}$$

where the first inequality follows from Jensen’s inequality, and the second inequality follows from Pinsker’s inequality.  $\square$

---

<sup>1</sup>We treat  $C$  as the lowest order interaction, so when we are subtracting from the 1-tensors (vectors)  $\theta^i$  to recenter them, we add the corresponding amount to  $C$ .

### A.3 No Cancellation

In this subsection we will show that a clique interaction of order  $s$  cannot be completely cancelled out by clique interactions of lower order.

**Lemma A.3.** *Let  $T^{1\dots s}$  be a centered tensor of dimensions  $d_1 \times \dots \times d_s$  and suppose there exists at least one entry of  $T^{1\dots s}$  which is lower bounded in absolute value by a constant  $\kappa$ . For any  $\ell < s$  and  $i_1 < \dots < i_\ell$  let  $T^{i_1\dots i_\ell}$  be an arbitrary centered tensor of dimensions  $d_{i_1} \times \dots \times d_{i_\ell}$ . Define*

$$T(a_1, \dots, a_s) = \sum_{\ell=1}^s \sum_{i_1 < \dots < i_\ell} T^{i_1\dots i_\ell}(a_{i_1}, \dots, a_{i_\ell}) \quad (7)$$

*and suppose the entries of  $T$  are bounded by a constant  $\mu$ . Then for any  $\ell$  and  $i_1 < \dots < i_\ell$ , the entries of  $T^{i_1\dots i_\ell}(a_{i_1}, \dots, a_{i_\ell})$  are bounded above by  $\mu\ell^\ell$ .*

*Proof.* The sum over all values of indices  $a_1, \dots, a_s$  on the right hand side is zero, so the same must hold for the left hand side. Assume for contradiction that every entry of  $T$  is upper bounded by  $\mu$ , to be optimized later. For each  $m$  from 1 to  $s$ , consider summing over all of the indices except  $a_m$ , which is held fixed. Using that the sum over tensor fibers is zero, we observe that the right hand side of (8) is just

$$T^{i_m}(a_1) \prod_{m' \neq m} d_{m'}$$

and the left hand side is strictly bounded in norm by  $\mu \prod_{m' \neq m} d_{m'}$  so  $|T^{i_m}(a_m)| < \mu$  for all  $a_m$ . We have proven this for all  $m$  from 1 to  $s$ .

Now we proceed by induction, assuming that  $t$  indices are fixed. We will show that the entries of the  $t$ -tensors are bounded above by  $\mu g(t)$  for  $g(t) = 2^{t(t+1)/2}$  and have already proven this for  $t = 1$ . Now suppose we fix  $a_1, \dots, a_t$ . We rearrange (8) to get

$$\begin{aligned} T(a_1, \dots, a_s) &= \sum_{\ell=1}^{t-1} \sum_{\{i_1 < \dots < i_\ell\} \subset [t]} T^{i_1\dots i_\ell}(a_{i_1}, \dots, a_{i_\ell}) \\ &= T^{1\dots t}(a_1, \dots, a_t) + \sum_{\ell=1}^s \sum_{\{i_1 < \dots < i_\ell\} \not\subset [t]} T^{i_1\dots i_\ell}(a_{i_1}, \dots, a_{i_\ell}) \end{aligned}$$

When we fix indices  $a_1, \dots, a_t$  and sum over the others, all but the first term on the rhs vanishes, and by applying the triangle inequality on the lhs and the induction hypothesis we get that

$$d_{t+1} \dots d_s \left( \mu + \sum_{\ell=1}^{t-1} \binom{t}{\ell} \mu g(\ell) \right) > d_{t+1} \dots d_s T^{u_{i_2} \dots i_t}(a_1, \dots, a_t)$$

so taking  $g(t)$  such that  $g(0) = 1$  and

$$g(t) \geq \sum_{\ell=0}^{t-1} \binom{t}{\ell} g(\ell)$$

and in particular  $g(t) = t^t$  works, because

$$t^t = (1 + (t-1))^t = \sum_{\ell=0}^t \binom{t}{\ell} (t-1)^\ell \geq \sum_{\ell=0}^{t-1} \binom{t}{\ell} \ell^\ell.$$

Thus we get that all the entries of  $T^{i_1\dots i_\ell}(a_{i_1}, \dots, a_{i_\ell})$  are bounded above by  $\mu\ell^\ell$ , which completes the proof.  $\square$

We are now ready to restate the above result in a more usable form:

**Lemma A.4.** Let  $T^{1 \cdots s}$  be a centered tensor of dimensions  $d_1 \times \cdots \times d_s$  and suppose there exists at least one entry of  $T^{1 \cdots s}$  which is lower bounded in absolute value by a constant  $\kappa$ . For any  $\ell < s$  and  $i_1 < \cdots < i_\ell$  let  $T^{i_1 \cdots i_\ell}$  be an arbitrary centered tensor of dimensions  $d_{i_1} \times \cdots \times d_{i_\ell}$ . Let

$$T(a_1, \dots, a_s) = \sum_{\ell=1}^s \sum_{i_1 < \cdots < i_\ell} T^{i_1 \cdots i_\ell}(a_{i_1}, \dots, a_{i_\ell}) \quad (8)$$

Then the sum over all the entries of  $T$  is 0, and there exists an entry of  $T$  of absolute value lower bounded by  $\kappa/s^s$ .

*Proof.* We apply the previous lemma with  $\mu = \kappa/s^s$ , and get that all the entries of  $T^{1 \cdots s}$  are bounded in absolute value by  $\mu s^s$ , giving a contradiction.  $\square$

## B Omitted Proofs in Section 3

**Lemma B.1.**

$$\mathbf{E}_{Y,Z} \left[ \sum_R \sum_{B \neq R} \left( \mathcal{E}_{u,R}^Y - \mathcal{E}_{u,B}^Y - \mathcal{E}_{u,R}^Z + \mathcal{E}_{u,B}^Z \right) \left( \exp(\mathcal{E}_{u,R}^Y + \mathcal{E}_{u,B}^Z) - \exp(\mathcal{E}_{u,B}^Y + \mathcal{E}_{u,R}^Z) \right) \right] \geq \frac{4\alpha^2 \delta^{r-1}}{r^{2r} e^{2\gamma}}$$

*Proof.* Setting  $a = \mathcal{E}_{u,R}^Y + \mathcal{E}_{u,B}^Z$  and  $b = \mathcal{E}_{u,B}^Y + \mathcal{E}_{u,R}^Z$ , letting  $D' = K^3 \exp(2\gamma) \geq D$ , and taking an expectation over the randomness in  $Y$  and  $Z$ , we have

$$\begin{aligned} \mathbf{E}_{Y,Z} \left[ \sum_R \sum_{B \neq R} (a - b)(e^a - e^b) \right] &= \mathbf{E} \left[ \sum_R \sum_{B \neq R} (a - b) \int_b^a e^x dx \right] \\ &\geq \mathbf{E} \left[ \sum_R \sum_{B \neq R} (a - b)^2 e^{-2\gamma} \right] \geq \frac{1}{e^{2\gamma}} \sum_R \sum_{B \neq R} \mathbf{Var}[a - b] \end{aligned}$$

where the inequality follows from the fact that  $a, b \geq -2\gamma$ . In the following claim, we give a more convenient expression for the above quantity.

**Claim B.2.**

$$\sum_R \sum_{B \neq R} \mathbf{Var}[a - b] = 4k_u \sum_R \mathbf{Var}[\mathcal{E}_{u,R}^Y]$$

*Proof.* Using the fact that  $a - b = (\mathcal{E}_{u,R}^Y - \mathcal{E}_{u,B}^Y) + (\mathcal{E}_{u,B}^Z - \mathcal{E}_{u,R}^Z)$  we have that

$$\begin{aligned} \sum_R \sum_{B \neq R} \mathbf{Var}[a - b] &= \sum_R \sum_{B \neq R} \mathbf{Var}[(\mathcal{E}_{u,R}^Y - \mathcal{E}_{u,B}^Y) + (\mathcal{E}_{u,B}^Z - \mathcal{E}_{u,R}^Z)] \\ &= 2 \sum_R \sum_{B \neq R} \mathbf{Var}[(\mathcal{E}_{u,R}^Y - \mathcal{E}_{u,B}^Y)] \\ &= 2 \sum_R \sum_{B \neq R} \left( 2 \mathbf{Var}[\mathcal{E}_{u,R}^Y] - 2 \mathbf{Cov}(\mathcal{E}_{u,R}^Y, \mathcal{E}_{u,B}^Y) \right) \\ &= 2 \sum_R \left( 2(k_u - 1) \mathbf{Var}[\mathcal{E}_{u,R}^Y] - 2 \mathbf{Cov}(\mathcal{E}_{u,R}^Y, \sum_{B \neq R} \mathcal{E}_{u,B}^Y) \right) \\ &= 2 \sum_R \left( 2(k_u - 1) \mathbf{Var}[\mathcal{E}_{u,R}^Y] - 2 \mathbf{Cov}(\mathcal{E}_{u,R}^Y, -\mathcal{E}_{u,R}^Y) \right) \\ &= 4k_u \sum_R \mathbf{Var}[\mathcal{E}_{u,R}^Y] \end{aligned}$$

where the second to last equality follows from the fact that the tensors are centered which gives  $\sum_R \mathcal{E}_{u,R}^Y = 0$  for any  $Y$ . This completes the proof.  $\square$

Now we can complete the proof by appealing to the law of total variance. By assumption there is a maximal hyperedge  $J = \{u, j_1 \dots j_s\}$  containing  $u$  with  $|J| \leq r$ , such that  $\theta^{uJ}$  is  $\alpha$ -nonvanishing. Then we have

$$\sum_R \text{Var}[\mathcal{E}_{u,R}^Y] \geq \sum_R \text{Var}[\mathcal{E}_{u,R}^Y | Y_{\sim J}] = \sum_R \text{Var}[T(R, Y_{j_1}, \dots, Y_{j_s}) | Y_{\sim J}]$$

where the tensor  $T$  is defined by treating  $Y_{\sim J}$  as fixed as follows

$$T(R, Y_{j_1}, \dots, Y_{j_s}) = \sum_{\ell=2}^r \sum_{i_2 < \dots < i_\ell} \theta^{ui_2 \dots i_\ell}(R, Y_{i_2}, \dots, Y_{i_\ell})$$

Now we claim there is a choice of  $R$ ,  $G$  and  $G'$  so that  $|T(R, G) - T(R, G')| > \alpha/r^r$ . This follows because from Lemma A.4 we have that  $T$  is  $\alpha/r^r$ -nonvanishing. Hence there is a choice of  $R$  and  $G$  so that  $|T(R, G)| > \alpha/r^r$ . Because  $T$  is centered there must be a  $G'$  so that  $T(R, G')$  has the opposite sign.

Finally for this choice of  $R$  we have

$$\text{Var}[T(R, Y_{j_1}, \dots, Y_{j_s}) | Y_{\sim J}] \geq \frac{\alpha^2 \delta^{r-1}}{2r^{2r}}$$

which follows from the fact that  $\Pr(Y_{J \setminus u} = G)$  and  $\Pr(Y_{J \setminus u} = G')$  are both lower bounded by  $\delta^{r-1}$  and the following elementary lower bound on the variance:

**Claim B.3.** *Let  $Z$  be a random variable such that  $\Pr(Z = a) \geq p$  and  $\Pr(Z = b) \geq p$ , then*

$$\text{Var}(Z) \geq \frac{p}{2}(a - b)^2$$

*Proof.*

$$\text{Var}(Z) \geq p(a - \mathbf{E}[Z])^2 + p(\mathbf{E}[Z] - b)^2 \geq p\left(a - \frac{a+b}{2}\right)^2 + p\left(b - \frac{a+b}{2}\right)^2 = \frac{p}{2}(a - b)^2$$

□

Putting this all together we have

$$\mathbf{E}_{Y,Z} \left[ \sum_R \sum_{R \neq B} (a - b)(e^a - e^b) \right] \geq \frac{4\alpha^2 \delta^{r-1}}{r^{2r} e^{2\gamma}}$$

which is the desired bound. This completes the proof. □

## C Omitted Proofs in Section 4

### C.1 Mutual Information in Markov Random Fields

**Lemma C.1.** *For any strategy,*

$$\mathbf{E}[\Delta] \leq \gamma K \binom{D}{r-1} \mathbf{E}_{I, X_I, R} \left[ |\Pr[X_u = R | X_I] - \Pr[X_u = R]| \right]$$

*Proof.* Intuitively this follows because Bob's optimal strategy given  $I$ ,  $X_I$  and  $R$  is to guess

$$r = \text{sgn}(\Pr[X_u = R | X_I] - \Pr[X_u = R])\gamma K$$

More precisely, we have

$$\begin{aligned} \mathbf{E}[\Delta] &= \mathbf{E}_{I, X_I, R} \left[ \mathbf{E}_{X \sim I, X'} \left[ r \mathbb{1}_{X_u=R} - r \mathbb{1}_{X'_u=R} \mid I, X_I, R \right] \right] \\ &= \mathbf{E}_{I, X_I, R} \left[ r \Pr[X_u = R | X_I] - r \Pr[X'_u = R] \right] \\ &= \mathbf{E}_{I, X_I, R} \left[ r \Pr[X_u = R | X_I] - r \Pr[X_u = R] \right] \\ &\leq \gamma K \binom{D}{r-1} \mathbf{E}_{I, X_I, R} \left[ |\Pr[X_u = R | X_I] - \Pr[X_u = R]| \right] \end{aligned}$$

which completes the proof. □

Next we lower bound the mutual information using (essentially) the same quantity. We prove **Lemma C.2**.

$$\sqrt{\frac{1}{2}I(X_u; X_I)} \geq \frac{1}{K^r} \mathbf{E}_{X_I, R} \left[ |\Pr(X_u = R|X_I) - \Pr(X_u = R)| \right]$$

*Proof.* Applying Lemma A.2 with  $S = \emptyset$  we have that

$$\begin{aligned} \sqrt{\frac{1}{2}I(X_u; X_I)} &\geq \mathbf{E}_{R, G} \left[ |\Pr(X_u = R, X_I = G) - \Pr(X_u = R) \Pr(X_I = G)| \right] \\ &= \mathbf{E}_{R, G} \left[ |\Pr(X_I = G) \Pr(X_u = R|X_I = G) - \Pr(X_u = R)| \right] \\ &= \frac{1}{\prod_{i \in I} k_i} \sum_G \Pr(X_I = G) \mathbf{E}_R [|\Pr(X_u = R|X_I = G) - \Pr(X_u = R)|] \\ &\geq \frac{1}{K^r} \mathbf{E}_{R, X_I} \left[ |\Pr(X_u = R|X_I) - \Pr(X_u = R)| \right] \end{aligned}$$

where  $R$  and  $G$  are uniform (as in the definition of  $\nu_{u, I|S}$ ).  $\square$

Appealing to Lemma C.1, Lemma C.2 and Theorem 3.2 we conclude:

**Theorem C.3.** *Fix a non-isolated vertex  $u$  contained in at least one  $\alpha$ -nonvanishing maximal hyperedge. Then taking  $I$  uniformly at random from the subsets of the neighbors of  $u$  of size  $s = \min(r-1, \deg(u))$ ,*

$$\mathbf{E}_I \left[ \sqrt{\frac{1}{2}I(X_u; X_I)} \right] \geq \mathbf{E}_I [\nu_{u, I|\emptyset}] \geq C(\gamma, K, \alpha)$$

where explicitly

$$C(\gamma, K, \alpha) := \frac{4\alpha^2 \delta^{r-1}}{r^{2r} K^{r+1} \binom{D}{r-1} \gamma e^{2\gamma}}$$

## C.2 Extensions to Conditional Mutual Information

In the previous subsection, we showed that  $X_u$  and  $X_I$  have positive mutual information. Here we show that the argument extends to conditional mutual information when we condition on  $X_S$  for any set  $S$  that does not contain all the neighbors of  $u$ . The main idea is to show that there is a setting of  $X_S$  where the hyperedges do not completely cancel out each other in the new Markov random field we obtain by conditioning on  $X_S$ .

More precisely fix a set of nodes  $S$  that does not contain all the neighbors of  $u$  and let  $I$  be chosen uniformly at random from the subsets of neighbors of  $u$  of size  $s = \min(r-1, |\Gamma(u) \setminus S|)$ . Then we have

$$\begin{aligned} \mathbf{E}_I \left[ \sqrt{\frac{1}{2}I(X_u; X_I|X_S)} \right] &= \mathbf{E}_I \left[ \sqrt{\frac{1}{2} \mathbf{E}_{X_S=x_S} [I(X_u; X_I|X_S = x_S)]} \right] \\ &\geq \mathbf{E}_{I, X_S=x_S} \left[ \sqrt{\frac{1}{2}I(X_u; X_I|X_S = x_S)} \right] \end{aligned}$$

which follows from Jensen's inequality. Now conditioned on  $X_S = x_S$  the resulting distribution is again a Markov random field and  $\gamma$  does not increase.

**Definition C.4.** Let  $E$  be the event that conditioned on  $X_S = x_S$ , node  $u$  is contained in at least one  $\alpha/r^r$ -nonvanishing maximal hyperedge.

**Lemma C.5.**  $\Pr(E) \geq \delta^d$

*Proof.* When we fix  $X_S = x_S$  we obtain a new Markov random field where the underlying hypergraph is

$$\mathcal{H}' := ([n] \setminus S, H') \text{ where } H' = \{h \setminus S | h \in H\}$$

For notational convenience let  $\phi(h)$  be the image of a hyperedge  $h$  in  $\mathcal{H}$  in the new hypergraph  $\mathcal{H}'$ . What makes things complicated is that a hyperedge in  $\mathcal{H}'$  can have numerous preimages. The crux of our argument is in how to select the right one to show is  $\alpha/r^r$ -nonvanishing. First we observe that  $u$  is contained in at least one non-empty hyperedge in  $\mathcal{H}'$ . This is because by assumption  $S$  does not contain all the neighbors of  $u$ . Hence there is some neighbor  $v \notin S$ . Since  $v$  is a neighbor of  $u$  it means that there is a hyperedge  $h \in H$  that contains both  $u$  and  $v$ . In particular  $\phi(h)$  contains  $u$  and is nonempty.

Now that we know  $u$  is not isolated in  $\mathcal{H}'$ , let  $h^*$  be a hyperedge in  $\mathcal{H}$  that contains  $u$  and where  $\phi(h^*)$  is maximal. Now let  $f_1, f_2, \dots, f_p$  be the preimages of  $\phi(h^*)$  so that without loss of generality  $f_1$  is maximal in  $\mathcal{H}$ . Now let  $J = \bigcup_{i=1}^p f_i \setminus \{u\}$ . In particular,  $J$  is the set of neighbors of  $u$  that are contained in at least one of  $f_1, f_2, \dots, f_p$ . Finally let  $J_1 = J \cap S := \{i_1, i_2, \dots, i_s\}$  and let  $J_2 = J \setminus S := \{i'_1, i'_2, \dots, i'_{s'}\}$ . We can now define

$$T(R, a_1, \dots, a_s, a'_1, \dots, a'_{s'}) = \sum_{i=1}^p \theta^{f_i}$$

which is the clique potential we get on hyperedge  $\phi(h^*)$  when we fix each index in  $J_1 \subseteq S$  to their corresponding value.

Suppose for the purposes of contradiction that all the entries of  $T$  are strictly bounded in absolute value by  $\alpha/r^r$ . Then applying Lemma A.3 in the contrapositive we see that the entries of  $f_1$  are strictly bounded above in absolute value by  $\alpha$ , but  $f_1$  is maximal and thus  $\alpha$ -nonvanishing, which yields a contradiction. Thus there is some setting  $a_1^*, \dots, a_s^*$  such that the tensor

$$T'(R, a'_1, \dots, a'_{s'}) = T(R, a_1^*, \dots, a_s^*, a'_1, \dots, a'_{s'})$$

has at least one entry with absolute value at least  $\alpha/r^r$ . Under this setting,  $\phi(h^*)$  is  $\alpha/r^r$ -nonvanishing and by construction maximal in  $\mathcal{H}'$  and thus we would be done. All that remains is to lower bound the probability of this setting. Since  $J_1$  is a subset of the neighbors of  $u$  we have  $|J_1| \leq d$ . Thus the probability that  $(X_{i_1}, \dots, X_{i_s}) = (a_1^*, \dots, a_s^*)$  is bounded below by  $\delta^s \geq \delta^d$ , which completes the proof.  $\square$

Now we are ready to prove a lower bound on conditional mutual information:

**Theorem C.6.** *Fix a vertex  $u$  such that all of the maximal hyperedges containing  $u$  are  $\alpha$ -nonvanishing, and a subset of the vertices  $S$  which does not contain the entire neighborhood of  $u$ . Then taking  $I$  uniformly at random from the subsets of the neighbors of  $u$  not contained in  $S$  of size  $s = \min(r-1, |\Gamma(u) \setminus S|)$ ,*

$$\mathbf{E}_I \left[ \sqrt{\frac{1}{2} I(X_u; X_I | X_S)} \right] \geq E_I[\nu_{u,I|S}] \geq C'(\gamma, K, \alpha)$$

where explicitly

$$C'(\gamma, K, \alpha) := \frac{4\alpha^2 \delta^{r+d-1}}{r^{2r} K^{r+1} \binom{D}{r-1} \gamma e^{2\gamma}}$$

*Proof.* We have

$$\mathbf{E}_{I, X_S} \left[ \sqrt{\frac{1}{2} I(X_u; X_I | X_S)} \right] \geq \mathbf{E}_{I, X_S=x_S} \left[ \sqrt{\frac{1}{2} I(X_u; X_I | X_S = x_S)} \mathbb{1}_E \right] \geq \delta^d C(\gamma, K, \alpha)$$

where the last inequality follows by invoking Lemma C.5 and applying Theorem C.3 to the new Markov random field we get by conditioning on  $X_S = x_S$ .  $\square$

## D Omitted Proofs in Section 5

### D.1 Learning Markov Random Fields

The algorithm will succeed provided that  $\hat{\nu}_{u,I|S}$  is sufficiently close to the true value  $\nu_{u,I|S}$ . This motivates the definition of the event  $A$ :

**Definition D.1.** We denote by  $A(\ell, \epsilon)$  the event that for all  $u, I$  and  $S$  with  $|I| \leq r - 1$  and  $|S| \leq \ell$  simultaneously,

$$|\nu_{u,i|S} - \hat{\nu}_{u,i|S}| < \epsilon.$$

We let  $A$  denote the event  $A(L, \tau/2)$ .

The proof of the following technical lemma is left to an appendix.

**Lemma D.2.** Fix a set  $S$  with  $|S| \leq \ell$  and suppose that for any set  $T \supseteq S$  with  $|T \setminus S| \leq r$ , that

$$|\widehat{\Pr}(X_T = x_T) - \Pr(X_T = x_T)| < \sigma.$$

If  $\sigma \leq \epsilon K^{-\ell} \frac{\delta^\ell}{5}$  then for any  $I$  with  $|I| \leq r - 1$ ,

$$|\nu_{u,i|S} - \hat{\nu}_{u,i|S}| < \epsilon.$$

**Lemma D.3.** Fix  $\ell, \epsilon$  and  $\omega > 0$ . If the number of samples satisfies

$$m \geq \frac{15K^{2\ell}}{\epsilon^2 \delta^{2\ell}} \left( \log(1/\omega) + \log(\ell + r) + (\ell + r) \log(nK) + \log 2 \right)$$

then  $\Pr(A(\ell, \epsilon)) \geq 1 - \omega$ .

*Proof of Lemma D.3.* Fix  $\ell, \epsilon$  and  $\omega > 0$ . Let  $m$  denote the number of samples. By Hoeffding's inequality, for any set  $T$ ,

$$\Pr[|\widehat{\Pr}(X_T = x_T) - \Pr(X_T = x_T)| > \sigma] \leq 2 \exp(-2\sigma^2 m)$$

and taking the union bound over all possibly  $x_T$  for  $T$  with  $|T| \leq \ell + r$ , of which there are at most

$$\sum_{i=1}^{\ell+r} \binom{n}{i} K^i \leq \sum_{i=1}^{\ell+r} (nK)^i \leq (\ell + r)(nK)^{\ell+r}$$

many, we find the probability that  $|\widehat{\Pr}(X_T = x_T) - \Pr(X_T = x_T)| > \sigma$  for any such  $T$  is at most

$$(\ell + r)(nK)^{\ell+r} 2 \exp(-2\sigma^2 m)$$

Therefore taking

$$m \geq \frac{\log(1/\omega) + \log(\ell + r) + (\ell + r) \log(nK) + \log 2}{2\sigma^2} \quad (9)$$

ensures this probability is at most  $\omega$ .

Now applying Lemma D.2 and substituting  $\sigma = \epsilon K^{-\ell} \frac{\delta^\ell}{5}$  into (9), we see that the result holds if

$$m \geq \frac{15K^{2\ell}}{\epsilon^2 \delta^{2\ell}} \left( \log(1/\omega) + \log(\ell + r) + (\ell + r) \log(nK) + \log 2 \right)$$

□

**Lemma D.4.** Assume that the event  $A$  holds. Then every time a node  $i$  is added to  $S$  in Step 2 of the algorithm, the mutual information  $I(X_u; X_S)$  increases by at least  $\tau^2/8$ .

*Proof.* For a particular iteration of Step 2, let  $I$  denote the newly added set of nodes, and  $S$  the set of candidate neighbors before adding  $I$ . Then we must show for  $Q = \tau^2/8$  that

$$I(X_u; X_{S \cup \{I\}}) \geq I(X_u; X_S) + Q$$

which by the chain rule for expectation is equivalent to

$$I(X_u; X_I | X_S) \geq Q.$$

Applying Lemma A.2 and the fact that event  $A$  holds, we see

$$\sqrt{\frac{1}{2} \cdot I(X_u; X_I | X_S)} \geq \frac{1}{2} \nu_{u,i|S} \geq \frac{1}{2} (\hat{\nu}_{u,i|S} - \tau/2)$$

Thus the algorithm only adds node  $i$  to  $S$  if  $\hat{\nu}_{u,i|S} \geq \tau$ , so the chain of inequalities implies that

$$I(X_u; X_i | X_S) \geq \frac{1}{2} (\tau - \tau/2)^2 = \tau^2/8$$

□

**Lemma D.5.** *If event A holds then at the end of Step 2,  $S$  contains all of the neighbors of  $u$ .*

*Proof.* Step 2 ended either because  $|S| > L$  or because there was no set of nodes  $I \subset S^C$  with  $\hat{\nu}_{u,I|S} > \tau$ . First we rule out the former possibility. Whenever a new element is added to  $S$ , the quantity  $I(X_u; X_S)$  increases by at least  $\tau^2/8$ . But

$$I(X_u; X_S) \leq H(X_u) \leq \log K$$

because  $X_u$  takes on at most  $K$  states. Thus if  $|S| > L$  then

$$\log K \geq I(X_u; X_S) > L(\tau^2/8) = \log K$$

which gives a contradiction.

Thus at the end of Step 2 we must have that there is no set of nodes  $I \subset S^C$  with  $\hat{\nu}_{u,I|S} > \tau$ . Suppose for the purposes of contradiction that  $S$  does not contain all of the neighbors of  $u$ . Then by Theorem C.6, there exists a subset of the neighbors such that  $\nu_{u,I|S} \geq C'(\gamma, k, \alpha) = 2\tau$ , and because event A holds we know  $\hat{\nu}_{u,I|S} > 2\tau - \tau/2 > \tau$ , which gives us our contradiction and completes the proof of the lemma.  $\square$

**Lemma D.6.** *If event A holds and if at the start of Step 3  $S$  contains all neighbors of  $u$ , then at the end of Step 3 the remaining set of nodes are exactly the neighbors of  $u$ .*

*Proof.* If  $A(\ell)$  holds, then during Step 3,

$$\hat{\nu}_{u,i|S \setminus \{i\}} < \nu_{u,i|S} + \tau/2 \leq \sqrt{\frac{1}{2}I(X_u; X_i|X_S)} + \tau/2 = \tau/2$$

for all nodes  $i$  that are not neighbors of  $u$ . Thus all such nodes are pruned. Furthermore, by Theorem C.6,  $\hat{\nu}_{u,i|S \setminus \{i\}} > \nu_{u,i|S \setminus \{i\}} - \tau/2 \geq 2\tau - \tau/2 = 3\tau/2$  for all neighbors of  $u$  and thus no neighbor is pruned. This completes the proof.  $\square$

Recall that  $\gamma \leq \beta r D^r$ ,  $\delta = e^{-2\gamma}/K$ ,  $(C'(\gamma, K, \alpha))^{-1} = O(\frac{K^{r+1}r^{2r}}{\alpha^2 \delta^{2D}} D^{r-1} \gamma e^{-2\gamma})$  and  $L = O(C'(\gamma, K, \alpha)^{-2})$ .

**Theorem D.7.** *Fix  $\omega > 0$ . Suppose we are given  $m$  samples from an  $\alpha, \beta$ -non-degenerate Markov random field with  $r$ -order interactions where the underlying graph has maximum degree at most  $D$  and each node takes on at most  $K$  states. Suppose that*

$$m \geq \frac{60K^{2L}}{\tau^2 \delta^{2L}} \left( \log(1/\omega) + \log(L+r) + (L+r) \log(nK) + \log 2 \right).$$

*Then with probability at least  $1 - \omega$ , MRFNBHD when run starting from each node  $u$  recovers the correct neighborhood of  $u$ , and thus recovers the underlying graph  $G$ . Furthermore, each run of the algorithm takes  $O(mLn^r)$  time.*

*Proof.* Set  $\ell = L$  and  $\epsilon = \tau/2$  in Lemma D.3. Then event A occurs with probability at least  $1 - \omega$  for our choice of  $m$ . Now by Lemma D.5 and Lemma D.6 the algorithm returns the correct set of neighbors of  $u$  for every node  $u$ .

To analyze the running time, observe that when running algorithm MRFNBHD at a single node  $u$ , the bottleneck is Step 2, in which there are at most  $L$  steps and in each step the algorithm must loop over all subsets of the vertices in  $[n] \setminus S$  of size  $r - 1$ , of which there are  $\sum_{\ell=1}^{r-1} \binom{n}{\ell} = O(n^{r-1})$  many. Running the algorithm at all nodes thus takes  $O(mLn^r)$  time.  $\square$

**Remark D.8.** Note that when we plug in the values of  $\gamma$  and  $\delta$  we get that the overall sample complexity of our algorithm in terms of  $D$  and  $r$  is doubly exponential in  $D^r$ .



## D.2 Extensions

### D.2.1 Learning with Bounded Queries

Our starting point is an elementary observation about MRFNBHD:

**Observation 1.** *In Step 2, MRFNBHD only needs  $\hat{\nu}_{u,I|S}$  for all  $I$  with  $|I| \leq r-1$ . Similarly at Step 3, MRFNBHD only needs  $\hat{\nu}_{u,i|S \setminus i}$  for each  $i \in S$ .*

Thus the number of distinct terms  $\hat{\nu}_{u,I|S}$  which MRFNBHD needs is at most  $L(r-1)n^{r-1}$  for Step 2 and  $R$  for Step 3, which in total is at most  $Lrn^{r-1}$ .

**Lemma D.9.** *Fix a node  $u$ , a set  $S$  with  $\ell = |S|$ , a set  $I$  with  $|I| \leq r-1$  and fix  $\epsilon$  and  $\omega > 0$ . If the number of samples we observe of  $X_{S \cup I \cup \{u\}}$  satisfies*

$$m' \geq \frac{15K^{2\ell}}{\epsilon^2 \delta^{2\ell}} \left( \log(1/\omega) + \log(\ell+r) + (\ell+r) \log(nK) + \log 2 \right)$$

then

$$|\nu_{u,I|S} - \hat{\nu}_{u,I|S}| < \epsilon$$

with probability at least  $1 - \omega$ .

*Proof.* This follows by the same Hoeffding and union bound as in proof of Lemma D.3.  $\square$

**Theorem D.10.** *Fix an  $\alpha, \beta$ -non-degenerate Markov random field with  $r$ -order interactions where the underlying graph has maximum degree at most  $D$  and each node takes on at most  $K$  states. The bounded queries modification to the algorithm returns the correct neighborhood of every vertex  $u$  using  $m' Lrn^r$  bounded queries of size at most  $L+r$  where*

$$m' = \frac{60K^{2L}}{\tau^2 \delta^{2L}} \left( \log(Lrn^r/\omega) + \log(L+r) + (L+r) \log(nK) + \log 2 \right),$$

with probability at least  $1 - \omega$ .

*Proof.* Invoking Lemma D.9 with  $\omega' = \frac{\omega}{Lrn^r}$ ,  $\epsilon = \tau/2$  and  $\ell = L$ , we get that each query to  $\hat{\nu}_{u,I|S}$  fails (i.e. is wrong by at least  $\tau/2$ ) with probability at most  $\frac{\omega}{Lrn^r}$ . We observed that Algorithm MRFNBHD makes at most  $Lrn^{r-1}$  queries of the form,  $\hat{\nu}_{u,I|S}$ . Therefore, by a union bound, with probability at least  $1 - \omega/n$ , the bounded queries algorithm answers all of those queries to within tolerance  $\tau/2$ .

Now it follows as in Theorem D.7 that the algorithm returns the correct neighborhood of node  $u$  with probability at least  $1 - \omega/n$ , and taking the union bound over all nodes  $u$  it follows that the algorithm recovers the correct neighborhood of all nodes with probability at least  $1 - \omega$ . This completes the proof.  $\square$

### D.2.2 Learning with Random Erasures

Here we consider another variant where we do not observe full samples from a Markov random field. Instead we observe partial samples where the state of each node is revealed independently with probability  $p$ , and the choice of which nodes to reveal is independent of the sample. We can apply our algorithm in this setting, as follows.

**Lemma D.11.** *With probability at least  $1 - \epsilon$ , if we take  $N \frac{\ell \log n + \log \ell + \log N/\epsilon}{p^2}$  samples then we will see each set  $S$  at least  $N$  times for every  $|S| \leq \ell$ .*

*Proof.* Each sample has at least a  $p^\ell$  chance of being observed, and there are at most  $\ell n^\ell$  many different sets  $S$ . So by a union bound,

$$Pr[\text{exists unobserved } S \text{ after } t \text{ steps}] \leq n^\ell (1 - p^\ell)^t \leq \epsilon/N$$

if we take  $t = \frac{\ell \log n + \log \ell + \log N/\epsilon}{p^2}$ . Repeating this  $N$  times, we see that with

$$Nt = N \frac{\ell \log n + \log \ell + \log N/\epsilon}{p^2}$$

many samples, we see every  $S$  at least  $N$  times with probability at least  $1 - \epsilon$ .  $\square$

**Lemma D.12.** Fix  $\ell, \epsilon$  and  $\omega > 0$ . If the number of samples satisfies

$$m \geq N \frac{\ell \log N + \log \ell + \log 2N/\omega}{p^2}$$

where

$$N = \frac{15K^{2\ell}}{\epsilon^2 \delta^{2\ell}} \left( \log(2/\omega) + \log(\ell + r) + (\ell + r) \log(nK) + \log 2 \right)$$

then  $\Pr(A(\ell, \epsilon)) \geq 1 - \omega$ .

*Proof.* Observe by Lemma D.11, taking  $\epsilon = \omega/2$  that with probability at least  $1 - \omega/2$ , for every set  $S$  with  $|S| \leq \ell$  we see at least  $N$  samples revealing all of the members of  $S$ . Condition on this event; now the proof is exactly the same as Lemma D.3 taking  $\omega' = \omega/2$ , applying Hoeffding, Lemma D.2 and taking the union bound, we see that event  $A$  holds with probability at least  $\omega/2$ . Therefore the total probability  $A$  occurs is at least  $1 - \omega/2 - \omega/2 = 1 - \omega$ .  $\square$

**Theorem D.13.** Fix  $\omega > 0$ . Suppose we are given  $m$  samples from an  $\alpha, \beta$ -non-degenerate Markov random field with  $r$ -order interactions where the underlying graph has maximum degree at most  $D$  and each node takes on at most  $K$  states. Suppose that

$$m \geq N \frac{\ell \log n + \log L + \log 2N/\omega}{p^2}$$

where

$$N = \frac{60K^{2L}}{\tau^2 \delta^{2L}} \left( \log(2/\omega) + \log(L + r) + (L + r) \log(nK) + \log 2 \right).$$

Then with probability at least  $1 - \omega$ , MRFNBHD when run starting from each node  $u$  recovers the correct neighborhood of  $u$ , and thus recovers the underlying graph  $G$ . Furthermore, each run of the algorithm takes  $O(mLn^r)$  time.

*Proof.* By Lemma D.12, given our assumption on  $m$  the event  $A$  occurs with probability at least  $1 - \omega$ . Conditioned on event  $A$ , the algorithm returns the correct answer by the same argument as Theorem D.7.  $\square$

## E Proof of Lemma D.2

*Proof.* Observe the left hand side of our desired inequality is bounded by

$$\begin{aligned} E_{R,G} [\widehat{\mathbf{E}}_{X_S} [|\widehat{\Pr}(X_u = R, X_I = G|X_S) - \widehat{\Pr}(X_u = R|X_S)\widehat{\Pr}(X_I = G|X_S)|] \\ - \mathbf{E}_{X_S} [|\Pr(X_u = R, X_I = G|X_S) - \Pr(X_u = R|X_S)\Pr(X_I = G|X_S)|]] \end{aligned}$$

So it suffices if we can bound for every  $R$  and  $G$

$$\begin{aligned} & \left| \widehat{\mathbf{E}}_{X_S} [|\widehat{\Pr}(X_u = R, X_I = G|X_S) - \widehat{\Pr}(X_u = R|X_S)\widehat{\Pr}(X_I = G|X_S)|] \right. \\ & \quad \left. - \mathbf{E}_{X_S} [|\Pr(X_u = R, X_I = G|X_S) - \Pr(X_u = R|X_S)\Pr(X_I = G|X_S)|] \right| \\ &= \left| \sum_{x_S} |\widehat{\Pr}(X_u = R, X_I = G, X_S = x_S) - \widehat{\Pr}(X_u = R|X_S = x_S)\widehat{\Pr}(X_I = G, X_S = x_S)| \right. \\ & \quad \left. - |\Pr(X_u = R, X_I = G, X_S = x_S) - \Pr(X_u = R|X_S = x_S)\Pr(X_I = G, X_S = x_S)| \right| \\ &\leq \sum_{x_S} \left| |\widehat{\Pr}(X_u = R, X_I = G, X_S = x_S) - \widehat{\Pr}(X_u = R|X_S = x_S)\widehat{\Pr}(X_I = G, X_S = x_S)| \right. \\ & \quad \left. - |\Pr(X_u = R, X_I = G, X_S = x_S) - \Pr(X_u = R|X_S = x_S)\Pr(X_I = G, X_S = x_S)| \right| \\ &\leq \sum_{x_S} \left| \widehat{\Pr}(X_u = R, X_I = G, X_S = x_S) - \widehat{\Pr}(X_u = R|X_S = x_S)\widehat{\Pr}(X_I = G, X_S = x_S) \right. \\ & \quad \left. - \Pr(X_u = R, X_I = G, X_S = x_S) + \Pr(X_u = R|X_S = x_S)\Pr(X_I = G, X_S = x_S) \right| \end{aligned}$$

$$\begin{aligned}
&\leq \sum_{x_S} |\widehat{\mathbf{Pr}}(X_u = R, X_I = G, X_S = x_S) - \mathbf{Pr}(X_u = R, X_I = G, X_S = x_S)| \\
&\quad + \sum_{x_S} |\widehat{\mathbf{Pr}}(X_u = R|X_S = x_S) \widehat{\mathbf{Pr}}(X_I = G, X_S = x_S) - \mathbf{Pr}(X_u = R|X_S) \mathbf{Pr}(X_I = G, X_S = x_S)| \\
&\leq K^{|S|} \sigma + \sum_{x_S} |\widehat{\mathbf{Pr}}(X_u = R|X_S = x_S) \widehat{\mathbf{Pr}}(X_I = G, X_S = x_S) - \mathbf{Pr}(X_u = R|X_S = x_S) \mathbf{Pr}(X_I = G, X_S = x_S)|
\end{aligned}$$

To bound the second term, observe

$$\begin{aligned}
&|\widehat{\mathbf{Pr}}(X_u = R|X_S = x_S) \widehat{\mathbf{Pr}}(X_I = G, X_S = x_S) - \mathbf{Pr}(X_u = R|X_S) \mathbf{Pr}(X_I = G, X_S = x_S)| \\
&\leq \widehat{\mathbf{Pr}}(X_u = R|X_S = x_S) |\widehat{\mathbf{Pr}}(X_I = G, X_S = x_S) - \mathbf{Pr}(X_I = G, X_S = x_S)| \\
&\quad + \mathbf{Pr}(X_I = G, X_S = x_S) |\widehat{\mathbf{Pr}}(X_u = R|X_S = x_S) - \mathbf{Pr}(X_u = R|X_S)| \\
&\leq |\widehat{\mathbf{Pr}}(X_I = G, X_S = x_S) - \mathbf{Pr}(X_I = G, X_S = x_S)| + |\widehat{\mathbf{Pr}}(X_u = R|X_S = x_S) - \mathbf{Pr}(X_u = R|X_S)| \\
&\leq \sigma + |\widehat{\mathbf{Pr}}(X_u = R|X_S = x_S) - \mathbf{Pr}(X_u = R|X_S)|
\end{aligned}$$

and furthermore

$$\begin{aligned}
&|\widehat{\mathbf{Pr}}(X_u = R|X_S = x_S) - \mathbf{Pr}(X_u = R|X_S = x_S)| \\
&= \left| \frac{\widehat{\mathbf{Pr}}(X_u = R, X_S = x_S)}{\widehat{\mathbf{Pr}}(X_S = x_S)} - \frac{\mathbf{Pr}(X_u = R, X_S = x_S)}{\mathbf{Pr}(X_S = x_S)} \right| \\
&\leq \left| \frac{\widehat{\mathbf{Pr}}(X_u = R, X_S = x_S)}{\widehat{\mathbf{Pr}}(X_S = x_S)} - \frac{\mathbf{Pr}(X_u = R, X_S = x_S)}{\widehat{\mathbf{Pr}}(X_S = x_S)} \right| \\
&\quad + \left| \frac{\mathbf{Pr}(X_u = R, X_S = x_S)}{\widehat{\mathbf{Pr}}(X_S = x_S)} - \frac{\mathbf{Pr}(X_u = R, X_S = x_S)}{\mathbf{Pr}(X_S = x_S)} \right| \\
&\leq \frac{\sigma}{\delta^{|S|}} + \mathbf{Pr}(X_u = R, X_S = x_S) \left| \frac{\mathbf{Pr}(X_S = x_S) - \widehat{\mathbf{Pr}}(X_S = x_S)}{\widehat{\mathbf{Pr}}(X_S = x_S) \mathbf{Pr}(X_S = x_S)} \right| \leq \frac{\sigma}{\delta^{|S|}} + \frac{\sigma}{\delta^{|S|} - \sigma}
\end{aligned}$$

Finally, if  $\sigma < \epsilon K^{-\ell} \frac{\delta^\ell}{5}$  then because  $|S| \leq \ell$  and  $\sigma < \delta^\ell/5 < \delta^\ell/2$

$$\begin{aligned}
K^{|S|} \sigma + \sum_{x_S} \left( \sigma + \frac{\sigma}{\delta^{|S|}} + \frac{\sigma}{\delta^{|S|} - \sigma} \right) &= K^{|S|} \sigma \left( 2 + \frac{1}{\delta^{|S|}} + \frac{1}{\delta^{|S|} - \sigma} \right) \\
&< K^{|S|} \sigma \left( \frac{2}{\delta^{|S|}} + \frac{1}{\delta^{|S|}} + \frac{2}{\delta^{|S|}} \right) < \epsilon
\end{aligned}$$

□

## References

- [1] Guy Bresler. Efficiently learning ising models on arbitrary graphs. In *Proceedings of the Forty-Seventh Annual ACM on Symposium on Theory of Computing*, pages 771–782. ACM, 2015.
